# Supplementary material for: Safety of Fingolimod in Patients with Multiple Sclerosis Switched from Natalizumab: Results from TRANSITION―A 2-Year, Multicenter, Observational, Cohort Study
Source: MDPI journal article supplement (doi:10.3390/brainsci12020215), 2022-02-04
Supplement: s1 [file s1]

## **Supplementary material**

### *Methods*

Annualized relapse rate (ARR) is defined as the number of relapses with onset occurring during a specific period of time, adjusted to a one-year period. The group-level ARR was calculated by total number of relapses experienced by all patients in the group during a specified time period, divided by the total number of days in that specified time period, and the ratio multiplied by 365.25. Patient-level ARR was calculated by the number of relapses experienced by that patient divided by the number of days the patient participated in the study, and the ratio multiplied by 365.25.

### *Results from subgroup analysis*

Overall, 67.3% of patients from the prospective and 69.9% from the retrospective group switched to fingolimod from natalizumab owing to their JCV seropositivity. Similarly, 27.4% in the prospective group and 34.6% in the retrospective group switched to fingolimod because of >2 years of treatment duration with natalizumab.

A total of 188 relapses were observed in 117 prospective patients and 144 relapses were observed in 85 retrospective patients. Majority of relapses were treated in both groups (prospective group, 167 [88.8%]; retrospective group, 120 [83.3]) and 73.9% and 78.5% of patients from prospective and retrospective groups, respectively, recovered either completely or partially.

Figure S1. TRANSITION study design.

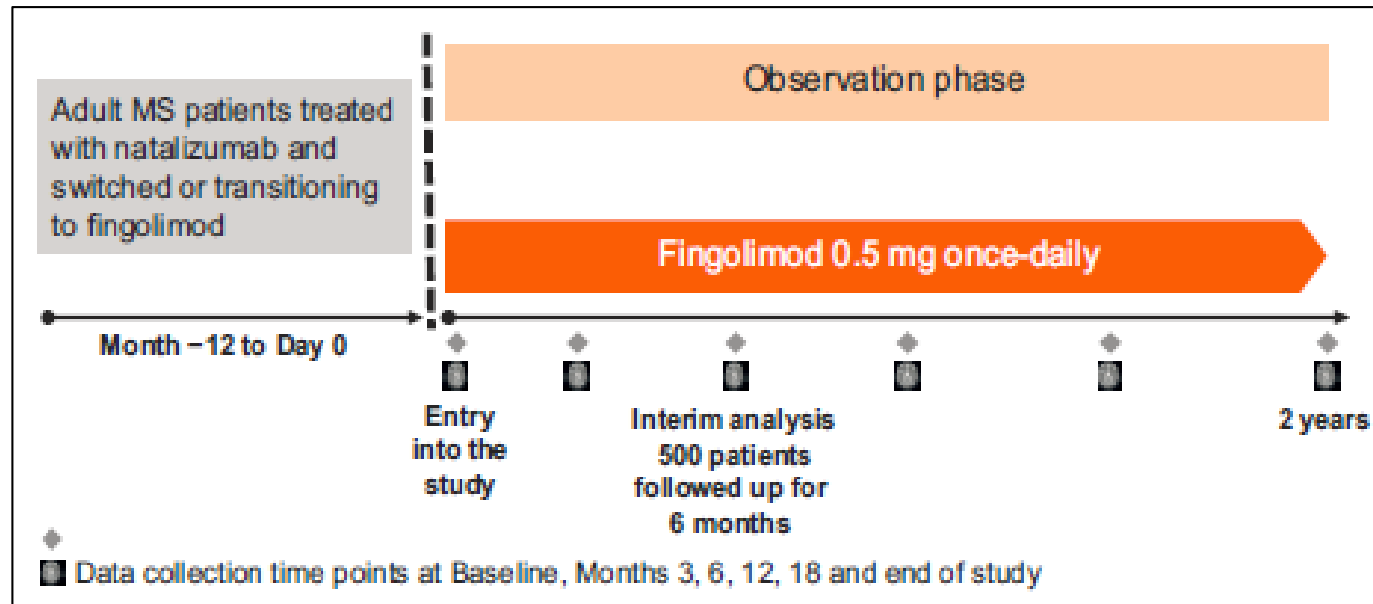

**Table S1. Patient enrollment centers.**

| Center Country | No. of Pts Enrolled | No. of sites |
|----------------|---------------------|--------------|
| Germany        | 85                  | 35           |
| United States  | 233                 | 50           |
| Canada         | 28                  | 4            |
| Greece         | 19                  | 5            |
| Israel         | 12                  | 2            |
| Italy          | 133                 | 15           |
| Portugal       | 2                   | 1            |
| United Kingdom | 31                  | 7            |
| Ireland        | 16                  | 3            |
| Belgium        | 59                  | 9            |
| Norway         | 24                  | 5            |

**Table S2. Occurrence of AEs and SAEs.**

| Subgroup                                   |          | AEs                  |         | SAEs                 |         |
|--------------------------------------------|----------|----------------------|---------|----------------------|---------|
|                                            |          | ORR (95% CI)         | P value | ORR (95% CI)         | P value |
| Natalizumab washout period                 | ≤8 weeks | 1.093 (0.848, 1.409) | 0.4915  | 0.910 (0.467, 1.774) | 0.7828  |
|                                            | >8 weeks |                      |         |                      |         |
| Natalizumab exposure                       | ≤2 years | 0.974 (0.779, 1.220) | 0.8215  | 0.883 (0.493, 1.582) | 0.6757  |
|                                            | >2 years |                      |         |                      |         |
| Exposure to prior immunosuppressive agents | No       | 1.848 (1.017, 3.358) | 0.0440  | 0.952 (0.224, 4.038) | 0.9469  |
|                                            | Yes      |                      |         |                      |         |
| JCV status                                 | Negative | 1.327 (0.988, 1.782) | 0.0602  | 1.735 (0.835, 3.606) | 0.1400  |
|                                            | Positive |                      |         |                      |         |

**Table S3. Frequent AEs and SAEs reported in different subgroups (safety set).**

| Subgroup                   | AEs, n (%); IR                        | Commonly reported AEs |                | SAEs, n (%); IR | Commonly reported SAEs n; IR                                                                              |
|----------------------------|---------------------------------------|-----------------------|----------------|-----------------|-----------------------------------------------------------------------------------------------------------|
|                            |                                       | AEs >5%               | n (%); IR      |                 |                                                                                                           |
| Natalizumab washout period | ≤8 weeks (N=156)<br>118 (75.6); 107.8 | Fatigue               | 25 (16.0); 9.5 | 14 (9.0); 4.9   | >1 patient<br>UTI (n=2; 0.67)<br>MS relapse (n=2; 0.67)                                                   |
|                            |                                       | Diarrhea              | 16 (10.3); 5.7 |                 |                                                                                                           |
|                            |                                       | Lymphopenia           | 13 (8.3); 4.5  |                 |                                                                                                           |
|                            |                                       | Headache              | 13 (8.3); 4.6  |                 |                                                                                                           |
|                            |                                       | UTI                   | 12 (7.7); 4.2  |                 |                                                                                                           |
|                            |                                       | Paresthesia           | 10 (6.4); 3.5  |                 |                                                                                                           |
|                            |                                       | Nasopharyngitis       | 10 (6.4); 3.4  |                 |                                                                                                           |
|                            |                                       | Arthralgia            | 10 (6.4); 3.5  |                 |                                                                                                           |
|                            |                                       | Muscular weakness     | 10 (6.4); 3.5  |                 |                                                                                                           |
|                            |                                       | Back pain             | 9 (5.8); 3.1   |                 |                                                                                                           |
|                            | >8 weeks (N=470)<br>338 (71.9); 86.8  | Fall                  | 8 (5.1); 2.7   | 66 (14.0); 7.6  | >2 patients<br>UTI (n=4; 0.42)<br>MS relapse (n=11; 1.16)<br>Generalized tonic-clonic seizure (n=4; 0.42) |
|                            |                                       | Insomnia              | 8 (5.1); 2.7   |                 |                                                                                                           |
|                            |                                       | Fatigue               | 49 (10.4); 5.5 |                 |                                                                                                           |
|                            |                                       | Headache              | 48 (10.2); 5.4 |                 |                                                                                                           |
|                            |                                       | UTI                   | 45 (9.6); 5.0  |                 |                                                                                                           |
| Natalizumab exposure       | ≤2 years (N=236)<br>182 (77.1); 101.0 | Depression            | 35 (7.5); 3.8  | 30 (12.7); 6.8  | >1 patient<br>UTI (n=2; 0.41)                                                                             |
|                            |                                       | Lymphopenia           | 31 (6.6); 3.4  |                 |                                                                                                           |
|                            |                                       | Constipation          | 24 (5.1); 2.6  |                 |                                                                                                           |
|                            |                                       | Fatigue               | 25 (10.6); 5.6 |                 |                                                                                                           |
|                            |                                       | Headache              | 22 (9.3); 4.9  |                 |                                                                                                           |

|                                            |                  |                   |                   |                |                 |                                                                                                           |
|--------------------------------------------|------------------|-------------------|-------------------|----------------|-----------------|-----------------------------------------------------------------------------------------------------------|
| Exposure to prior immunosuppressive agents | >2 years (N=381) | 272 (71.4); 85.4  | Constipation      | 16 (6.8); 3.4  | 50 (13.1); 7.1  | MS relapse (n=6; 1.25)                                                                                    |
|                                            |                  |                   | Depression        | 16 (6.8); 3.4  |                 | Headache (n=2; 0.41)                                                                                      |
|                                            |                  |                   | Diarrhea          | 15 (6.4); 3.2  |                 | Psychotic disorder (n=2; 0.41)                                                                            |
|                                            |                  |                   | Muscular weakness | 14 (5.9); 3.0  |                 |                                                                                                           |
|                                            |                  |                   | Hypoaesthesia     | 12 (5.1); 2.5  |                 |                                                                                                           |
|                                            |                  |                   | Nausea            | 12 (5.1); 2.6  |                 |                                                                                                           |
|                                            |                  |                   | Fatigue           | 48 (12.6); 6.9 |                 | >2 patients                                                                                               |
|                                            |                  |                   | Headache          | 38(10.0); 5.3  |                 |                                                                                                           |
|                                            |                  |                   | UTI               | 36 (9.5); 5.0  |                 | UTI (n=4; 0.52)                                                                                           |
|                                            |                  |                   | Depression        | 25 (6.6); 3.4  |                 | MS relapse (n=7; 0.92)                                                                                    |
|                                            | No (N=574)       | 424 (73.9); 93.4  | Lymphopenia       | 24 (6.3); 3.3  | 74 (12.9); 7.0  | Generalized tonic-clonic seizure (n=3; 0.39)                                                              |
|                                            |                  |                   | Fall              | 20 (5.3); 2.7  |                 |                                                                                                           |
|                                            |                  |                   | Fatigue           | 65 (11.3); 6.1 |                 | >2 patients                                                                                               |
|                                            |                  |                   | Headache          | 57 (9.9); 5.3  |                 |                                                                                                           |
|                                            |                  |                   | UTI               | 55 (9.6); 5.1  |                 | UTI (n=6; 0.52)                                                                                           |
|                                            |                  |                   | Depression        | 40 (7.0); 3.6  |                 | MS relapse (n=12; 1.05)                                                                                   |
|                                            |                  |                   | Lymphopenia       | 39 (6.8); 3.5  |                 | Generalized tonic-clonic seizure (n=3; 0.26)                                                              |
|                                            |                  |                   | Diarrhea          | 33 (5.8); 3.0  |                 | Seizure (n=3; 0.26)                                                                                       |
|                                            | Yes (N=24)       | 12 (50.0); 44.1   | Lymphopenia       | 4 (16.7); 11.0 | 2 (8.3); 5.1    | All SAEs were reported in 1 patient only                                                                  |
|                                            |                  |                   | Headache          | 3 (12.5); 7.3  |                 |                                                                                                           |
|                                            |                  |                   | Back pain         | 2 (8.3); 5.0   |                 |                                                                                                           |
|                                            |                  |                   | Constipation      | 2 (8.3); 4.9   |                 |                                                                                                           |
|                                            |                  |                   | Hypoaesthesia     | 2 (8.3); 4.9   |                 |                                                                                                           |
| JCV status                                 | Negative (N=96)  | 76 (79.2) (131.5) | UTI               | 13 (13.5); 7.5 | 17 (17.7); 10.4 | >1 patient<br>UTI (n=2; 1.05)<br>Seizure (n=2; 1.06)                                                      |
|                                            |                  |                   | Headache          | 10 (10.4); 5.8 |                 |                                                                                                           |
|                                            |                  |                   | Lymphopenia       | 9 (9.4); 5.1   |                 |                                                                                                           |
|                                            |                  |                   | Diarrhea          | 9 (9.4); 5.0   |                 |                                                                                                           |
|                                            |                  |                   | Constipation      | 8 (8.3); 4.5   |                 |                                                                                                           |
|                                            |                  |                   | Nasopharyngitis   | 7 (7.3); 3.9   |                 |                                                                                                           |
|                                            |                  |                   | Seizure           | 7 (7.3); 3.9   |                 |                                                                                                           |
|                                            |                  |                   | Depression        | 6 (6.3); 3.3   |                 |                                                                                                           |
|                                            |                  |                   | Hypoaesthesia     | 6 (6.3); 3.3   |                 |                                                                                                           |
|                                            |                  |                   | Muscle spasms     | 5 (5.2); 2.8   |                 |                                                                                                           |
|                                            |                  |                   | Alopecia          | 5 (5.2); 2.7   |                 |                                                                                                           |
|                                            |                  |                   | Arthralgia        | 5 (5.2); 2.7   |                 |                                                                                                           |
|                                            |                  |                   | Nausea            | 5 (5.2); 2.7   |                 |                                                                                                           |
|                                            |                  |                   | Paresthesia       | 5 (5.2); 2.7   |                 |                                                                                                           |
|                                            |                  |                   | URTI              | 5 (5.2); 2.7   |                 |                                                                                                           |
|                                            | Positive (N=507) | 369 (72.8); 87.7  | Fatigue           | 55 (10.9); 5.8 | 61 (12.0); 6.4  | >2 patients<br>UTI (n=3; 0.29)<br>MS relapse (n=12; 1.18)<br>Generalized tonic-clonic seizure (n=4; 0.39) |
|                                            |                  |                   | Headache          | 48 (9.5); 5.0  |                 |                                                                                                           |
|                                            |                  |                   | UTI               | 43 (8.5); 4.4  |                 |                                                                                                           |
|                                            |                  |                   | Lymphopenia       | 35 (6.9); 3.6  |                 |                                                                                                           |
|                                            |                  |                   | Depression        | 34 (6.7); 3.4  |                 |                                                                                                           |
|                                            |                  |                   | Muscular weakness | 28 (5.5); 2.8  |                 |                                                                                                           |

Table S4. Similar publications from the literature.

| Author name (year) | Title                                                                                      | No. of patients | Study findings                                                                                                                                      |
|--------------------|--------------------------------------------------------------------------------------------|-----------------|-----------------------------------------------------------------------------------------------------------------------------------------------------|
| Cohen et al., 2014 | Switching from natalizumab to fingolimod in multiple sclerosis: a French prospective study | 333             | A survey-based, observational multicenter cohort Study. Results suggest a washout period shorter than 3 months                                      |
| Comi et al., 2015  | Relapses in patients treated with fingolimod after previous exposure to natalizumab        | 254             | Fingolimod has the potential to reduce disease reactivation but that timing of treatment initiation may be critical for achieving an optimal effect |

|                         |                                                                                                                                                            |       |                                                                                                                                                                                                                                                                                                                                                                                                                                                                             |
|-------------------------|------------------------------------------------------------------------------------------------------------------------------------------------------------|-------|-----------------------------------------------------------------------------------------------------------------------------------------------------------------------------------------------------------------------------------------------------------------------------------------------------------------------------------------------------------------------------------------------------------------------------------------------------------------------------|
| De Seze 2013            | Reduction of the washout time between natalizumab and fingolimod.                                                                                          | 59    | Authors recommend reducing as much as possible the delay between the withdrawal of natalizumab and the introduction of fingolimod, to reduce the likelihood of a reactivation of the disease during this high-risk period                                                                                                                                                                                                                                                   |
| Guger et al., 2019      | Switching from natalizumab to fingolimod treatment in multiple sclerosis: real life data from the Austrian MS Treatment Registry                           | 195   | Switching from natalizumab to fingolimod in a real-world setting is efficacious and safe; results advocate for a short switching gap of 3 months or less                                                                                                                                                                                                                                                                                                                    |
| Havla et al., 2013      | Fingolimod reduces recurrence of disease activity after natalizumab withdrawal in multiple sclerosis                                                       | 26    | Initiation of fingolimod treatment after natalizumab discontinuation reduces the recurrence of disease activity compared to withdrawal without further immunomodulatory treatment                                                                                                                                                                                                                                                                                           |
| Jokubaitis et al., 2014 | <b>Fingolimod after natalizumab and the risk of short-term relapse</b>                                                                                     | 89    | Authors recommend a maximum 2-month treatment gap for switches to fingolimod to decrease the hazard of relapse                                                                                                                                                                                                                                                                                                                                                              |
| Kappos et al., 2015     | <b>Switching from natalizumab to fingolimod: a randomized, placebo-controlled study in RRMS</b>                                                            | 142   | Initiating fingolimod therapy 8–12 weeks after natalizumab discontinuation is associated with a lower risk of MRI and clinical disease reactivation than initiation after 16-week washout period                                                                                                                                                                                                                                                                            |
| Laroni et al., 2012     | Early switch to fingolimod may decrease the risk of disease recurrence after natalizumab interruption.                                                     | 11    | Results suggests that fingolimod might represent a valuable treatment choice for those individuals suspending natalizumab, in order to prevent disease reactivation.                                                                                                                                                                                                                                                                                                        |
| Leurs et al., 2017s     | Switching natalizumab to fingolimod within 6 weeks reduces recurrence of disease activity in MS patients                                                   | 52    | Patients with a washout period of >8 weeks had a significant higher recurrence of disease activity compared to patients with a WO period of <6 weeks.                                                                                                                                                                                                                                                                                                                       |
| Rinaldi 2012            | Switching therapy from natalizumab to fingolimod in relapsing-remitting multiple sclerosis: clinical and magnetic resonance imaging findings               | 22    | Patients were switched to fingolimod after 3 months of washout period. Fingolimod does not exert clinical activity quickly enough to stop MS reactivation after a break from natalizumab.                                                                                                                                                                                                                                                                                   |
| Vollmer et al., 2018    | The impact of very short transition times on switching from Natalizumab to Fingolimod on imaging and clinical effectiveness outcomes in multiple sclerosis | N=117 | Results suggest transition periods <1 month are associated with improved clinical outcomes and appears to be safe                                                                                                                                                                                                                                                                                                                                                           |
| Sempere et al., 2013    | Switching from natalizumab to fingolimod: an observational study                                                                                           | 18    | After switching to fingolimod, five of eight patients (63%) experienced clinical relapses, and MRI activity was detected in six of eight patients (75%). No serious side effects were observed with fingolimod.                                                                                                                                                                                                                                                             |
| Fragoso et al., 2016    | Safety of switching from natalizumab straight into fingolimod in a group of JCV-positive patients with multiple sclerosis                                  | 25    | median period of nine months from the medication switch, there were no safety issues to report. The patients had good disease control and no adverse events were reported.                                                                                                                                                                                                                                                                                                  |
| Naegelin et al., 2018   | Shortening the washout to 4 weeks when switching from natalizumab to fingolimod and risk of disease reactivation in multiple sclerosis                     | 25    | Switching from natalizumab to fingolimod with a washout of 4 weeks – without increasing risk – provides a slightly better protection against recurrent disease activity over 2 years as compared to a washout of 8 weeks                                                                                                                                                                                                                                                    |
| Ziemssen et al., 2019   | Long-term real-world evidence for sustained clinical benefits of fingolimod following switch from natalizumab                                              | 530   | The subgroup analysis from PANGAEA highlights that fingolimod exhibits a favorable benefit–risk profile over 48 months following a switch from natalizumab that is consistent with its benefit–risk profile, following a switch from other DMTs or in patients initiating fingolimod first line. No new safety signals were observed, and the likelihood of relapses between natalizumab discontinuation and fingolimod initiation increased with longer washout durations. |
